# Supplementary material for: A search for bacteria identified from cerebrospinal fluid shunt infections in previous surgical events
Source: PubMed Central journal article supplement (PMC11469614; doi:10.1371/journal.pone.0311605), 2024-10-10

**A**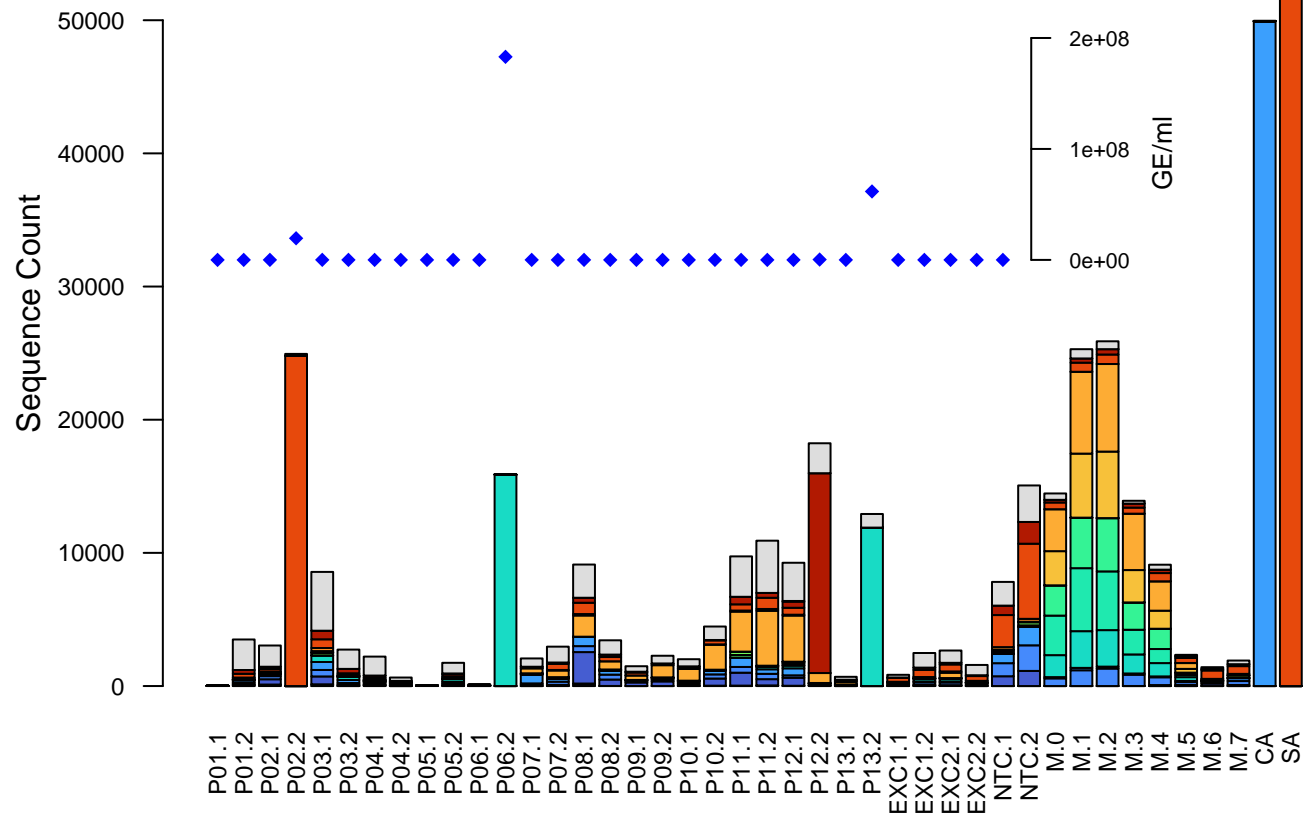**B**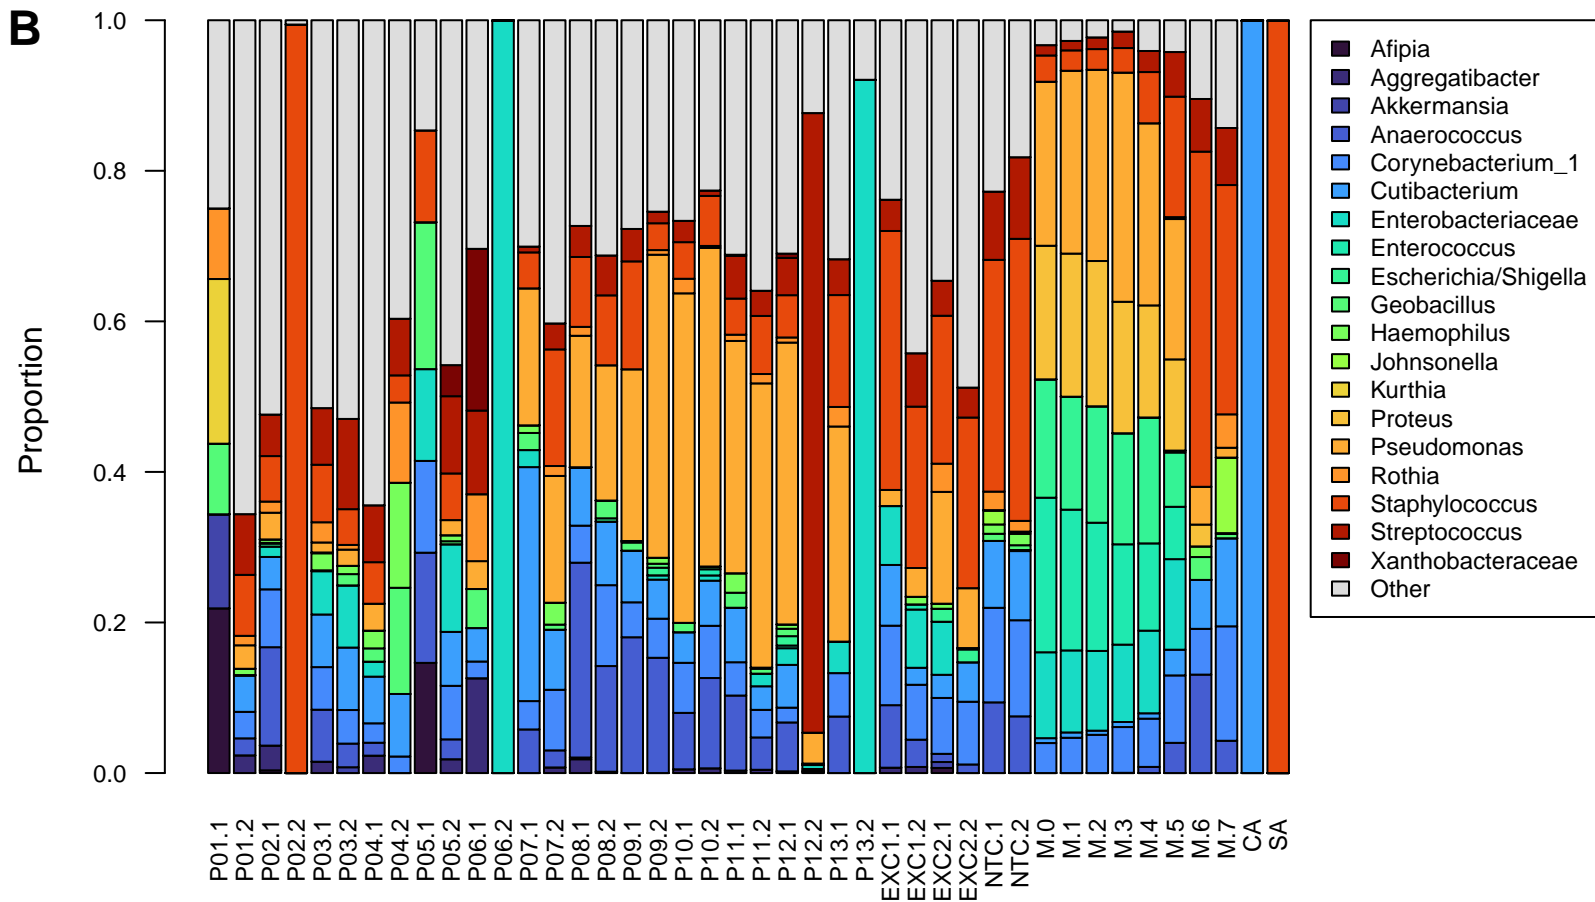

Supplement: pone.0311605.s002.pdf [file pone.0311605.s002.pdf]
